# Supplementary material
Source: Springer Nature journal article supplement (https://www.springermedizin.de/resource/supplementary/12982_2010_94_MOESM2_ESM.pdf/9604464)

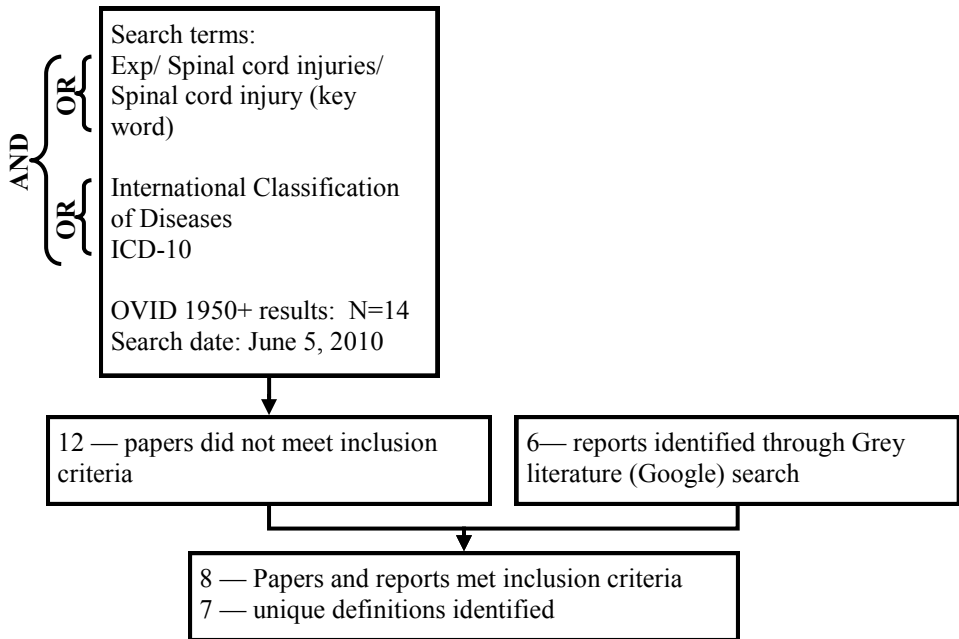

Supplement: MOESM2 [file 9604464]
